# Supplementary material
Source: publisher site journal article supplement (https://www.dovepress.com/article/564892)
Supplement: Supplementary file 1 [file 564892%20Revised%20Supplementary%20Tables%20and%20Figures_1.pdf]

**Table S1** Sixty-nine NET-related genes

| <b>HGNC symbol</b> | <b>Entrez Gene</b> | <b>Ensembl</b>  |
|--------------------|--------------------|-----------------|
| AKT1               | 207                | ENSG00000142208 |
| AKT2               | 208                | ENSG00000105221 |
| ATG7               | 10533              | ENSG00000197548 |
| CLEC6A             | 93978              | ENSG00000205846 |
| CSF3               | 1440               | ENSG00000108342 |
| CTSG               | 1511               | ENSG00000100448 |
| CYBB               | 1536               | ENSG00000165168 |
| DNASE1             | 1773               | ENSG00000213938 |
| ELANE              | 1991               | ENSG00000197561 |
| ENTPD4             | 14573              | ENSG00000197217 |
| F3                 | 2152               | ENSG00000117525 |
| HMGB1              | 3146               | ENSG00000189403 |
| IL17A              | 3605               | ENSG00000112115 |
| IL1B               | 3553               | ENSG00000125538 |
| IL6                | 3569               | ENSG00000136244 |
| IL8                | 3576               | ENSG00000169429 |
| IRAK4              | 51135              | ENSG00000198001 |
| ITGAM              | 3684               | ENSG00000169896 |
| ITGB2              | 3689               | ENSG00000160255 |
| KCNN3              | 3782               | ENSG00000143603 |
| MAPK1              | 5594               | ENSG00000100030 |
| MAPK3              | 5595               | ENSG00000102882 |
| MMP9               | 4218               | ENSG00000100985 |
| MPO                | 4353               | ENSG00000005381 |
| MTOR               | 2475               | ENSG00000198793 |
| PADI4              | 23569              | ENSG00000159339 |
| PTAFR              | 5724               | ENSG00000169403 |
| PIK3CA             | 5290               | ENSG00000121879 |
| RIPK1              | 8737               | ENSG00000137275 |
| RIPK3              | 11035              | ENSG00000129465 |
| SELP               | 6403               | ENSG00000174175 |
| SELPLG             | 6404               | ENSG00000110876 |
| SIGLEC14           | 10049587           | ENSG00000254415 |
| TLR2               | 7097               | ENSG00000137462 |
| TLR4               | 7099               | ENSG00000136869 |
| TLR7               | 51284              | ENSG00000196664 |
| TLR8               | 51311              | ENSG00000101916 |
| TNF                | 7124               | ENSG00000232810 |
| ALPL               | 249                | ENSG00000162551 |
| BST1               | 683                | ENSG00000109743 |
| CD93               | 22918              | ENSG00000125810 |

|           |       |                 |
|-----------|-------|-----------------|
| CEACAM3   | 1084  | ENSG00000170956 |
| CREB5     | 9586  | ENSG00000146592 |
| CRISPLD2  | 83716 | ENSG00000103196 |
| CSF3R     | 1441  | ENSG00000119535 |
| CYP4F3    | 4051  | ENSG00000186529 |
| DYSF      | 8291  | ENSG00000135636 |
| FCAR      | 2204  | ENSG00000186431 |
| FCGR3B    | 2215  | ENSG00000162747 |
| CPPED1    | 55315 | ENSG00000103381 |
| FPR1      | 2357  | ENSG00000171051 |
| FPR2      | 2358  | ENSG00000171049 |
| G0S2      | 50486 | ENSG00000123689 |
| H2BC      | 8347  | ENSG00000180596 |
| HPSE      | 10855 | ENSG00000173083 |
| CXCR1     | 3577  | ENSG00000163464 |
| CXCR2     | 3579  | ENSG00000180871 |
| KCNJ15    | 3772  | ENSG00000157551 |
| LILRB2    | 10288 | ENSG00000131042 |
| MGAM      | 8972  | ENSG00000257335 |
| MME       | 4311  | ENSG00000196549 |
| PDE4B     | 5142  | ENSG00000184588 |
| S100A12   | 6283  | ENSG00000163221 |
| SIGLEC5   | 8778  | ENSG00000105501 |
| SLC22A4   | 6583  | ENSG00000197208 |
| SLC25A37  | 51312 | ENSG00000147454 |
| TECPR2    | 9895  | ENSG00000196663 |
| TNFRSF10C | 8794  | ENSG00000173535 |
| VNN3      | 55350 | ENSG00000093134 |

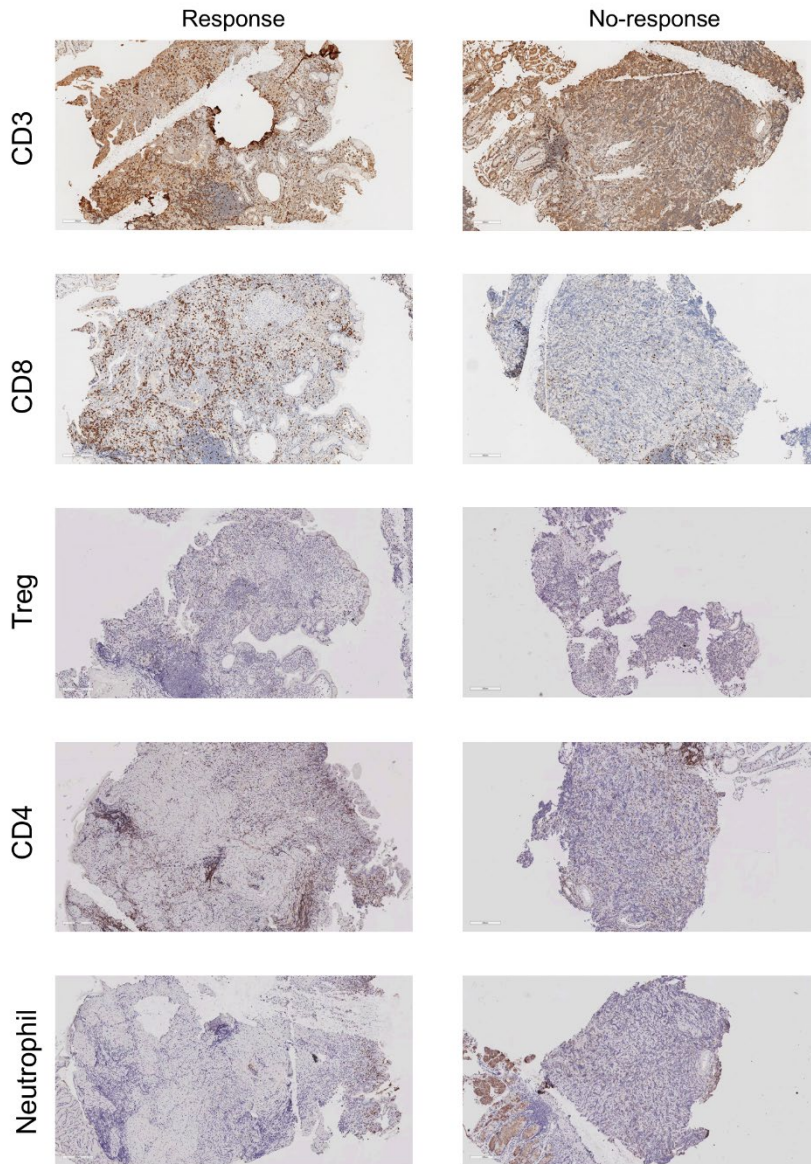

**Figure S1** *The high-resolution images and original uncropped IHC images*



|         |         |         |         |          |         |         |         |         |         |         |         |         |         |         |          |         |         |         |         |         |         |         |
|---------|---------|---------|---------|----------|---------|---------|---------|---------|---------|---------|---------|---------|---------|---------|----------|---------|---------|---------|---------|---------|---------|---------|
| CRTAM   | 54.8891 | 66.107  | 54.0563 | 1443.48  | 308.561 | 114.059 | 661.277 | 42.1529 | 47.769  | 829.669 | 261.162 | 652.858 | 212.042 | 761.032 | 38.2227  | 85.709  | 126.64  | 153.961 | 15.5496 | 106.159 | 78.306  | 83.9649 |
| CYRBB1  | 8.51088 | 9.16028 | 16.7768 | 6.78945  | 20.228  | 10.6391 | 8.2771  | 10.1849 | 10.5526 | 7.1682  | 9.60236 | 7.97278 | 9.39615 | 9.7069  | 12.1272  | 166.955 | 9.01675 | 8.79661 | 38.3769 | 16.7892 | 9.49799 | 9.57671 |
| CSF1    | 22.1079 | 21.8152 | 14.6424 | 22.9942  | 21.9402 | 32.271  | 23.5559 | 24.1776 | 19.733  | 39.1235 | 21.7205 | 24.4852 | 24.9689 | 687.884 | 35.2885  | 23.1222 | 112.582 | 93.5364 | 28.2172 | 61.8445 | 73.5934 | 22.9227 |
| CSF2    | 24.2483 | 23.2441 | 43.3558 | 24.7537  | 40.9524 | 28.014  | 22.9588 | 26.2622 | 62.7588 | 29.2781 | 741.315 | 70.4189 | 28.5239 | 39.5245 | 26.2936  | 40.0303 | 27.7372 | 47.0269 | 22.7372 | 47.8889 | 29.8643 | 45.985  |
| CSFSR   | 97.7663 | 29.9336 | 22.2778 | 24.3859  | 10.7207 | 32.1651 | 25.6594 | 38.9319 | 85.4434 | 38.8482 | 115.644 | 45.2333 | 233.915 | 214.543 | 860.337  | 737.86  | 92.4844 | 67.2519 | 186.085 | 121.256 | 248.397 | 217.736 |
| CSF7    | 29.1177 | 21.3348 | 14.0215 | 5.8181   | 19.8755 | 14.7061 | 746.27  | 322.062 | 1323.23 | 12102.6 | 11514.7 | 10179.8 | 63.6732 | 254.88  | 186.806  | 292.562 | 149.042 | 4059.44 | 2285.36 | 2487.6  | 61.261  | 23.733  |
| CTLA4   | 19.3916 | 12.0548 | 12.4    | 19.9927  | 282.31  | 606.104 | 1865.8  | 2019.94 | 40.7745 | 22.9841 | 11.0147 | 18.7122 | 18.6198 | 14.3167 | 18.58076 | 18.0367 | 16.4825 | 12.4936 | 18.0804 | 14.8006 | 62.2224 | 38.6936 |
| CTSG    | 247.771 | 204.703 | 205.376 | 113.0328 | 133.496 | 81.239  | 73.6946 | 38.0918 | 224.974 | 156.87  | 309.079 | 105.314 | 88.1262 | 65.3185 | 68.9828  | 42.0002 | 5638.07 | 54.7519 | 91.1776 | 185.008 | 10.1276 | 185.008 |
| CTSW    | 16.6579 | 14.0511 | 16.2618 | 48.9422  | 487.068 | 963.277 | 23.0875 | 14.6382 | 12.8332 | 41.44   | 6980.78 | 108.114 | 16.9373 | 15.9499 | 13.082   | 26.7636 | 16.2395 | 11.5167 | 111.469 | 277.466 | 41.7898 | 20.4914 |
| CXCL10  | 761.394 | 396.638 | 246.244 | 157.227  | 120.499 | 152.796 | 529.512 | 127.922 | 256.618 | 488.545 | 201.111 | 150.919 | 500.93  | 163.398 | 312.773  | 278.343 | 163.718 | 113.024 | 112.809 | 313.919 | 232.122 | 486.967 |
| CXCL11  | 20.2483 | 20.2483 | 13.0354 | 13.0354  | 13.0354 | 13.0354 | 13.0354 | 13.0354 | 13.0354 | 13.0354 | 13.0354 | 13.0354 | 13.0354 | 13.0354 | 13.0354  | 13.0354 | 13.0354 | 13.0354 | 13.0354 | 13.0354 | 13.0354 | 13.0354 |
| CXCL13  | 50.1801 | 22.7708 | 17.2471 | 22.3574  | 6.02497 | 8.95714 | 280.53  | 95.7894 | 13.5049 | 5.77276 | 10.0284 | 15.3178 | 11.7535 | 62.7931 | 18.7608  | 12.7441 | 21.2033 | 60.5655 | 25.7094 | 10.9463 | 10.9033 | 79.7905 |
| CXCL3   | 73.0704 | 28.0636 | 56.4475 | 26.7117  | 17.0206 | 30.0279 | 26.8418 | 27.6975 | 136.624 | 45.9066 | 17.0284 | 30.2181 | 175.883 | 1496.82 | 271.247  | 233.33  | 81.0368 | 157.022 | 149.961 | 19.464  | 44.0016 | 75.2692 |
| CXCL5   | 94.1649 | 83.049  | 43.3658 | 18.4202  | 7.7559  | 41.216  | 24.9405 | 18.9365 | 73.8583 | 78.8889 | 25.0801 | 29.0739 | 32.9447 | 5315.27 | 91.9805  | 46.3814 | 37.3928 | 387.404 | 49.5741 | 62.1747 | 29.2575 | 69.6139 |
| CXCL9   | 597.584 | 438.209 | 268.399 | 125.836  | 77.4588 | 151.504 | 259.461 | 143.577 | 159.218 | 220.911 | 186.924 | 590.362 | 265.083 | 168.497 | 38944    | 199.436 | 179.981 | 291.812 | 123.556 | 99.7602 | 193.921 | 403.504 |
| CXCR1   | 260.578 | 187.059 | 146.678 | 214.684  | 320.96  | 258.821 | 76.3549 | 71.4853 | 61.869  | 691.731 | 515.916 | 417.187 | 82.7814 | 72.0059 | 61.2698  | 53.221  | 65.5299 | 64.4227 | 263.789 | 267.968 | 229.476 | 5613.08 |
| CXCR2   | 26.7636 | 12.646  | 20.805  | 73.8171  | 57.0167 | 20.9995 | 11.1583 | 23.9973 | 74.6466 | 11.5823 | 26.6187 | 96.317  | 280.002 | 408.353 | 115.551  | 174.121 | 64.0791 | 176.836 | 48.427  | 126.094 | 56.9347 | 176.014 |
| CXCR5   | 368.781 | 286.684 | 10.1478 | 37.708   | 29.7922 | 181.825 | 20.1227 | 2508.08 | 32.4652 | 37.6659 | 31.9392 | 16.0338 | 15.131  | 14.6125 | 17.3637  | 212.275 | 14.4311 | 17.5363 | 26.9192 | 13.7321 | 16.885  | 55.8564 |
| CXCR6   | 143.967 | 137.922 | 129.418 | 239.578  | 92.277  | 190.125 | 1140.29 | 187.523 | 914.309 | 1037.9  | 187.523 | 914.309 | 1037.9  | 187.523 | 914.309  | 1037.9  | 187.523 | 914.309 | 1037.9  | 187.523 | 914.309 | 1037.9  |
| CXCR7   | 39.2654 | 19.4445 | 10.6258 | 102.172  | 236.764 | 111.244 | 152.511 | 14.2424 | 12.4948 | 294.272 | 54.6113 | 77.3874 | 8.0249  | 11.2973 | 6.98447  | 10.4459 | 7.42938 | 5.9091  | 7.40007 | 6.59899 | 73.8682 | 112.951 |
| CYP27A1 | 28.1703 | 29.9301 | 40.8098 | 35.1156  | 57.8008 | 119.211 | 20.989  | 60.3011 | 55.8977 | 98.197  | 36.9152 | 30.4051 | 761.596 | 9212.24 | 72.621   | 75.7109 | 807.582 | 190.712 | 731.246 | 853     | 17.578  | 52.9684 |
| CYP2B1  | 839.569 | 393.123 | 544.742 | 123.385  | 89.2151 | 182.605 | 99.2151 | 182.605 | 99.2151 | 182.605 | 99.2151 | 182.605 | 99.2151 | 182.605 | 99.2151  | 182.605 | 99.2151 | 182.605 | 99.2151 | 182.605 | 99.2151 | 182.605 |
| DACH1   | 8.11027 | 6.61425 | 7.01931 | 6.07293  | 26.6485 | 6.33289 | 3.96099 | 4.92986 | 16.7488 | 14.2475 | 34.1615 | 18.5566 | 63.0408 | 7.8212  | 4.27362  | 8.23249 | 5.41845 | 6.05427 | 30.5528 | 11.696  | 22.9445 | 80.6245 |
| DAPK2   | 50.4923 | 52.6611 | 24.9337 | 36.7782  | 35.9388 | 53.0877 | 21.0963 | 20.1996 | 71.8305 | 55.1124 | 75.1908 | 65.9825 | 50.3688 | 36.2955 | 35.1452  | 76.6887 | 50.6405 | 57.8225 | 260.259 | 126.567 | 113.077 | 494.764 |
| DCSTAMF | 36.9534 | 36.9534 | 36.9534 | 36.9534  | 36.9534 | 36.9534 | 36.9534 | 36.9534 | 36.9534 | 36.9534 | 36.9534 | 36.9534 | 36.9534 | 36.9534 | 36.9534  | 36.9534 | 36.9534 | 36.9534 | 36.9534 | 36.9534 | 36.9534 | 36.9534 |
| DEFNA   | 47.9634 | 47.9634 | 47.9634 | 47.9634  | 47.9634 | 47.9634 | 47.9634 | 47.9634 | 47.9634 | 47.9634 | 47.9634 | 47.9634 | 47.9634 | 47.9634 | 47.9634  | 47.9634 | 47.9634 | 47.9634 | 47.9634 | 47.9634 | 47.9634 | 47.9634 |
| DDNDM5E | 39.6533 | 82.4734 | 338.955 | 4.937    | 3.55474 | 6.17151 | 8.63943 | 2.14073 | 5.5009  | 5.92817 | 28.7555 | 42.9286 | 5.01965 | 14.5868 | 7.80832  | 36.7156 | 12.8774 | 28.4484 | 6.1105  | 12.8888 | 9.43945 | 11.6656 |
| DDPCD5  | 23.0637 | 33.4668 | 30.008  | 42.1083  | 192.018 | 41.8509 | 38.5346 | 136.495 | 19.6555 | 53.645  | 74.5348 | 143.26  | 40.1779 | 96.6174 | 168.283  | 190.192 | 106.052 | 38.1782 | 110.334 | 32.0167 | 57.2456 | 37.3192 |
| DGKA    | 42.9688 | 46.001  | 20.024  | 22.2302  | 30.6625 | 26.9002 | 25.851  | 26.9002 | 25.851  | 26.9002 | 25.851  | 26.9002 | 25.851  | 26.9002 | 25.851   | 26.9002 | 25.851  | 26.9002 | 25.851  | 26.9002 | 25.851  | 26.9002 |
| DHRS11  | 53.99   | 69.5507 | 10.1676 | 86.8181  | 123.952 | 27.1775 | 149.367 | 72.385  | 59.3323 | 34.7728 | 61.6241 | 48.5534 | 49.6566 | 296.501 | 18.6003  | 242.691 | 109.034 | 299.29  | 69.967  | 69.967  | 32.7403 | 53.3034 |
| DHRS13  | 13.8636 | 16.8936 | 12.8368 | 67.9571  | 29.9959 | 30.9959 | 14.8007 | 86.5691 | 85.1508 | 19.0155 | 126.714 | 29.6458 | 66.4278 | 21.9598 | 1394.31  | 233.583 | 34.0158 | 13.5113 | 27.3948 | 21.8459 | 18.0591 | 20.0978 |
| DHSPF2  | 695.874 | 239.634 | 11.8007 | 37.708   | 29.7922 | 181.825 | 20.1227 | 2508.08 | 32.4652 | 37.6659 | 31.9392 | 16.0338 | 15.131  | 14.6125 | 17.3637  | 212.275 | 14.4311 | 17.5363 | 26.9192 | 13.7321 | 16.885  | 55.8564 |
| DHSPF3  | 19.4517 | 16.9722 | 17.9877 | 68.9639  | 92.277  | 190.125 | 1140.29 | 187.523 | 914.309 | 1037.9  | 187.523 | 914.309 | 1037.9  | 187.523 | 914.309  | 1037.9  | 187.523 | 914.309 | 1037.9  | 187.523 | 914.309 | 1037.9  |
| DSC1    | 82.2625 | 48.0259 | 44.0095 | 40.8664  | 788.019 | 104.235 | 10.2183 | 7.63183 | 23.3228 | 82.601  | 21.9733 | 29.9658 | 14.9389 | 11.6692 | 6.70774  | 45.603  | 14.7399 | 41.2673 | 34.5126 | 35.7068 | 71.0654 | 15.3762 |
| DUSP2   | 13.2983 | 139.275 | 32.3402 | 40.834   | 318.017 | 2005.43 | 2312.35 | 2300.26 | 319.738 | 4596.06 | 494.213 | 30.717  | 404.895 | 490.424 | 567.664  | 261.495 | 292.319 | 536.691 | 39.9044 | 758.67  | 101.32  | 88.769  |
| EAF2    | 3181.18 | 2020.34 | 4989.76 | 219.018  | 240.986 | 138.142 | 265.175 | 197.165 | 208.077 | 181.162 | 198.017 | 184.102 | 683.962 | 281.012 | 284.13   | 281.422 | 239.812 | 468.074 | 401.726 | 399.882 | 742.534 | 240.854 |
| EBI3    | 10.5027 | 16.9365 | 8.99776 | 12.214   | 15.0571 | 11.5325 | 11.0999 | 11.6348 | 16.4032 | 4.36811 | 10.1243 | 16.8555 | 12.4947 | 14.1884 | 20.4377  | 31.206  | 18.6168 | 6.96924 | 8.95988 | 13.9474 | 9.4973  | 11.626  |
| EFNA5   | 54.2766 | 91.7102 | 8.93037 | 12.032   | 116.925 | 24.2995 | 13.9593 | 76.6587 | 240.324 | 77.7319 | 29.8512 | 43.7964 | 16.8739 | 14.6804 | 64.2662  | 56.8071 | 19.848  | 35.5319 | 59.9418 | 12.0728 | 81.9448 | 38.5877 |
| EGR2    | 122.34  | 98.2452 | 54.4716 | 35.9598  | 35.243  | 36.2384 | 210.011 | 1667.33 | 131.119 | 151.242 | 155.235 | 133.91  | 94.593  | 39.9137 | 23.0875  | 21.7576 | 4531.29 | 221.579 | 293.156 | 190.673 | 196.075 | 196.075 |
| EGR3    | 398.874 | 132.863 | 113.881 | 61.9545  | 47.9228 | 19.5126 | 12.6152 | 701.542 | 1031.19 | 62.6659 | 75.719  | 69.6267 | 96.6299 | 13.12   | 75.4039  | 130.622 | 115.702 | 14.713  | 15.63   | 230.763 | 24.613  | 45.985  |
| EMR1    | 499.011 | 383.061 | 194.387 | 195.986  | 428.065 | 312.812 | 400.218 | 182.939 | 333.835 | 447.367 | 349.079 | 188.521 | 181.51  | 20.312  | 35.828   | 21.4394 | 178.678 | 27.221  | 287.379 | 24.713  | 16.3307 | 12.531  |
| EMR2    | 145.977 | 105.654 | 67.1749 | 43.0595  | 56.1857 | 83.2635 | 72.5369 | 21.2498 | 96.2723 | 165.095 | 174.829 | 87.4389 | 1319.42 | 1045.04 | 1516.79  | 36.8316 | 863.002 | 35.7602 | 82.2941 | 1558.48 | 38.71   | 39.526  |
| EMR3    | 55.17   | 124.342 | 135.326 | 104.17   | 89.373  | 63.1996 | 89.5376 | 139.759 | 112.602 | 136.763 | 63.6421 | 64.877  | 379.624 | 38.8751 | 13.536   | 5.69071 | 17.831  | 19.1505 | 185.983 | 32.169  | 47.723  | 30.1599 |
| EPHA1   | 21.9842 | 67.0092 | 15.2096 | 235.335  | 12.9366 | 385.634 | 34.0714 | 89.9421 | 45.4788 | 9.63975 | 105.983 | 97.8029 | 25.1046 | 51.9155 | 7.16549  | 25.5659 | 17.9134 | 73.2098 | 9.70802 | 71.5572 | 104.632 | 16.4749 |
| EPHA4   | 47.0294 | 46.7689 | 52.0337 | 400.048  | 763.401 | 292.884 | 35.878  | 43.9325 | 61.8302 | 155.783 | 99.2117 | 63.8017 | 58.1182 | 45.6196 | 38.9035  | 60.0842 | 58.6478 | 39.1638 | 38.9647 | 56.7356 | 11.7426 | 11.7426 |
| EPOR2   | 46.9    |         |         |          |         |         |         |         |         |         |         |         |         |         |          |         |         |         |         |         |         |         |

|          |         |         |         |         |         |         |           |         |         |         |         |         |         |         |         |          |         |         |         |          |         |         |         |         |
|----------|---------|---------|---------|---------|---------|---------|-----------|---------|---------|---------|---------|---------|---------|---------|---------|----------|---------|---------|---------|----------|---------|---------|---------|---------|
| IL26     | 6.12067 | 7.62384 | 26.2663 | 7.41092 | 7.90237 | 9.52339 | 273.571   | 116.598 | 20.8208 | 10.7375 | 7.69138 | 5.13666 | 3.24256 | 2.49113 | 4.33019 | 4.36618  | 4.35573 | 4.5319  | 3.03223 | 38.0155  | 4.7763  | 4.55767 |         |         |
| IL28A    | 21.1625 | 19.4552 | 848.687 | 40.0022 | 818.793 | 2988.61 | 7562.49   | 2779.25 | 1382.55 | 1.19584 | 18.0264 | 19.9186 | 32.4112 | 25.1911 | 33.9872 | 39.6377  | 146.46  | 44.9608 | 22.219  | 193.265  | 31.0005 | 133.808 | 31.2229 |         |
| IL28B    | 21.1846 | 19.4552 | 848.687 | 40.0022 | 818.793 | 2988.61 | 7562.49   | 2779.25 | 1382.55 | 1.19584 | 18.0264 | 19.9186 | 32.4112 | 25.1911 | 33.9872 | 39.6377  | 146.46  | 44.9608 | 22.219  | 193.265  | 31.0005 | 133.808 | 31.2229 |         |
| IL3      | 20.1275 | 15.5855 | 15.8149 | 15.7023 | 34.4825 | 6.60381 | 1.6896    | 1.5626  | 3.9922  | 5.97339 | 13.5921 | 28.8125 | 11.5263 | 12.9627 | 8.7234  | 7.66457  | 6.76457 | 7.42909 | 9.04952 | 9.2942   | 7.2625  | 10.1454 | 52.5888 | 34.5858 |
| IL4R     | 11.0093 | 1.88367 | 291.13  | 884.659 | 2125.33 | 1148.81 | 864.196   | 414.23  | 3102.32 | 913.588 | 85.13   | 16.099  | 19.9222 | 1054.29 | 3007.59 | 846.614  | 1093.75 | 2410.48 | 3106.48 | 10452.79 | 1117.61 | 2809.1  | 11.2809 |         |
| IL5      | 6.16825 | 11.6119 | 9.69458 | 18.7116 | 11.3691 | 35.0736 | 159.955   | 28.0728 | 86.1697 | 34.7039 | 8.1695  | 13.8149 | 11.479  | 11.3283 | 48.5858 | 18.8379  | 15.9633 | 22.5392 | 12.5706 | 31.6791  | 72.8151 | 13.259  | 11.6552 |         |
| IL5RA    | 122.289 | 101.543 | 24.937  | 42.9451 | 26.5887 | 60.9311 | 43.6207   | 32.2031 | 103.2   | 114.832 | 45.6795 | 44.2707 | 41.0237 | 36.1397 | 43.7397 | 22.0447  | 51.5829 | 58.662  | 154.524 | 105.685  | 71.1216 | 256.057 | 11.8919 |         |
| IL7      | 250.925 | 11.452  | 40.9006 | 41.5794 | 34.707  | 60.255  | 68.388    | 43.1569 | 27.3943 | 24.7613 | 26.2285 | 51.3943 | 93.5078 | 133.487 | 79.2008 | 68.8808  | 143.507 | 55.5905 | 25.3031 | 18.1319  | 14.8919 | 11.8919 | 14.8919 |         |
| IL7R     | 277.716 | 454.55  | 126.908 | 15.952  | 195.133 | 18.0859 | 1965.11   | 3066.25 | 50.17   | 21.8833 | 115.94  | 341.629 | 163.305 | 50.729  | 21.6337 | 85.5914  | 215.618 | 77.9965 | 36.5611 | 325.729  | 358.084 | 742.672 | 11.8919 |         |
| IL8      | 60.029  | 7.008   | 65.44   | 41.0483 | 16.7027 | 65.44   | 41.0483   | 16.7027 | 65.44   | 41.0483 | 16.7027 | 65.44   | 41.0483 | 16.7027 | 65.44   | 41.0483  | 16.7027 | 65.44   | 41.0483 | 16.7027  | 65.44   | 41.0483 | 16.7027 | 65.44   |
| IRF8     | 956.39  | 7886.09 | 38.1214 | 350.349 | 279.688 | 45.4123 | 87.5646   | 610.549 | 196.616 | 99.7567 | 25.9847 | 2458.71 | 1929.66 | 1211.19 | 3495.42 | 1652.36  | 2798.26 | 363.726 | 798.945 | 519.985  | 281.068 | 161.068 | 161.068 |         |
| ITK      | 468.999 | 409.756 | 129.212 | 6471.89 | 9578.94 | 7704.63 | 3954.85   | 9006.84 | 7176.36 | 597.506 | 3056.94 | 3984.74 | 124.101 | 115.022 | 90.2245 | 171.2657 | 102.448 | 167.178 | 134.448 | 103.589  | 654.698 | 380.47  | 380.47  |         |
| KCNJA3   | 306.276 | 411.387 | 121.648 | 57.905  | 465.48  | 97.655  | 324.103   | 263.915 | 74.9929 | 40.6051 | 41.1394 | 577.173 | 143.553 | 102.942 | 129.913 | 20.6166  | 23.5447 | 15.0007 | 13.8169 | 18.0042  | 120.507 | 65.0552 | 65.0552 |         |
| KCNKG2   | 12.531  | 21.6233 | 20.722  | 18.1524 | 7.92416 | 12.0781 | 12.531    | 13.0927 | 7.9358  | 7.28188 | 17.8817 | 18.5688 | 18.8429 | 21.2862 | 32.6523 | 15.9312  | 16.3577 | 25.2255 | 18.1724 | 21.5578  | 26.699  | 11.7302 | 11.7302 |         |
| KIAA0276 | 7209.22 | 5267.69 | 47.131  | 41.6978 | 82.7923 | 64.877  | 50.3667   | 26.5348 | 87.2938 | 97.0527 | 54.3441 | 30.3631 | 176.396 | 104.6   | 210.47  | 71.669   | 61.8126 | 43.4273 | 108.407 | 90.2151  | 435.451 | 204.63  | 204.63  |         |
| KIAA0754 | 9780.55 | 716598  | 448.803 | 147.381 | 11.805  | 80.9645 | 7.8792    | 4.36618 | 76.1196 | 60.2282 | 151.046 | 100.259 | 44.7905 | 7.81907 | 44.8005 | 157.755  | 7.9256  | 4.64923 | 7.69025 | 90.2151  | 435.451 | 85.3978 | 7.87007 |         |
| KIR2DL1  | 7.40644 | 5.13713 | 4.49318 | 8.01647 | 12.7924 | 6.32889 | 1.2623    | 6.19852 | 24.5539 | 24.1777 | 281.984 | 532.252 | 5.11644 | 4.75183 | 8.60388 | 9.52212  | 4.5319  | 10.7248 | 30.9029 | 25.6528  | 7.45318 | 12.3442 | 12.3442 |         |
| KIR2DL4  | 331.776 | 242.597 | 326.566 | 122.225 | 125.324 | 79.0053 | 62.5414   | 71.0029 | 119.611 | 247.045 | 602.973 | 1892.52 | 128.825 | 99.7435 | 300.013 | 75.0782  | 110.773 | 151.831 | 97.222  | 116.901  | 187.147 | 289.809 | 289.809 |         |
| KIR2DS4  | 6.6244  | 4.15745 | 5.12456 | 28.6117 | 113.605 | 120.499 | 87.8165   | 129.462 | 189.826 | 544.822 | 1172.83 | 3011.55 | 129.085 | 114.125 | 136.085 | 62.9641  | 137.386 | 106.756 | 147.352 | 135.055  | 121.447 | 344.854 | 344.854 |         |
| KIR3DL2  | 12.2458 | 10.5791 | 7.59574 | 22.0604 | 14.1669 | 9.25105 | 13.1648   | 9.26245 | 30.0312 | 31.4491 | 511.294 | 1163.92 | 11.3889 | 6.90889 | 28.0155 | 13.7678  | 10.6414 | 9.63754 | 17.2002 | 14.7244  | 13.6424 | 20.0196 | 20.0196 |         |
| KIR3DL1  | 15.5289 | 13.7066 | 28.1314 | 23.2035 | 24.7683 | 9.96458 | 12.9556   | 23.9529 | 171.466 | 30.4286 | 18.2087 | 12.139  | 13.6408 | 10.8753 | 22.7438 | 37.9632  | 14.3057 | 11.3124 | 42.1158 | 19.7889  | 34.1017 | 15.7352 | 15.7352 |         |
| KLRB1    | 119.573 | 241.325 | 39.3735 | 8818.27 | 317.566 | 1006.26 | 500.689   | 4477.73 | 11.4425 | 10.26   | 126.364 | 12957.4 | 5576.72 | 90.2462 | 26.6851 | 33.3991  | 13.5124 | 94.7988 | 37.0027 | 37.4871  | 72.1378 | 276.44  | 322.616 |         |
| KLRC3    | 13.8407 | 44.6164 | 9.037   | 724.776 | 13.1886 | 32.0205 | 12.4117   | 5.74725 | 47.2092 | 586.938 | 1485.99 | 662.143 | 12.5886 | 6.24598 | 14.4442 | 9.75315  | 18.6764 | 9.44773 | 8.28115 | 15.2143  | 34.5013 | 87.7366 | 87.7366 |         |
| KLRC4    | 68.2502 | 85.0751 | 24.4663 | 213.175 | 48.8011 | 17.6763 | 22.2069   | 9.62447 | 33.7634 | 124.802 | 205.178 | 18.985  | 20.049  | 24.9315 | 10.4049 | 6.45883  | 10.4049 | 5.35637 | 13.7068 | 12.2503  | 44.9008 | 44.9008 |         |         |
| KLRD1    | 204.007 | 67.8236 | 244.895 | 107.813 | 25.1217 | 10.7829 | 7.38294   | 5.6925  | 14.026  | 33.3082 | 1596.94 | 1837.52 | 103.003 | 85.5472 | 207.81  | 88.796   | 63.9483 | 91.8998 | 59.9817 | 59.9817  | 125.25  | 95.137  | 95.137  |         |
| KLRF1    | 153.15  | 198.61  | 116.866 | 851.188 | 11.9277 | 12.3277 | 37.0575   | 13.0244 | 8.5397  | 36.62   | 10475.8 | 5911.21 | 100.115 | 21.904  | 76.1597 | 182.536  | 75.1535 | 65.8283 | 69.5823 | 59.5979  | 107.425 | 121.908 | 121.908 |         |
| KLRG1    | 1351.16 | 1076.36 | 482.771 | 385.915 | 46.472  | 1939.94 | 275.52    | 283.204 | 373.325 | 4631.81 | 1700.86 | 912.267 | 305.447 | 270.204 | 253.101 | 148.566  | 25.008  | 22.2402 | 13.1019 | 13.1333  | 44.8751 | 60.5395 | 60.5395 |         |
| KLRK1    | 670.271 | 860.471 | 77.8429 | 8228.46 | 353.846 | 476.276 | 26.246    | 69.1446 | 44.3235 | 519.592 | 8790.5  | 5454.73 | 78.9162 | 44.1476 | 38.5609 | 62.472   | 71.2242 | 47.2592 | 88.0196 | 77.9887  | 44.1242 | 246.444 | 246.444 |         |
| KRT18P50 | 23.9704 | 28.1515 | 87.6165 | 23.2008 | 44.1209 | 22.8749 | 18.7122   | 30.4705 | 73.2104 | 162.088 | 20.747  | 16.9179 | 58.2603 | 20.181  | 56.9721 | 20.1721  | 10.0553 | 51.6255 | 14.9773 | 18.0663  | 163.038 | 68.388  | 68.388  |         |
| KYNU     | 296.299 | 57.2525 | 97.4243 | 45.9486 | 41.3564 | 39.2061 | 27.3782   | 22.7438 | 128.328 | 117.086 | 70.765  | 66.7065 | 858.745 | 30.899  | 63.1557 | 105.912  | 19.736  | 73.0858 | 132.062 | 32.7691  | 62.4804 | 100.100 | 100.100 |         |
| LAS3     | 36.2549 | 8.73253 | 10.1036 | 121.304 | 226.927 | 175.186 | 99.9494   | 129.673 | 659.213 | 1296.73 | 659.213 | 1296.73 | 659.213 | 1296.73 | 659.213 | 1296.73  | 659.213 | 1296.73 | 659.213 | 1296.73  | 659.213 | 659.213 | 659.213 |         |
| LAR2     | 32.4479 | 67.9233 | 106.955 | 107.813 | 25.1217 | 10.7829 | 7.38294   | 5.6925  | 14.026  | 33.3082 | 1596.94 | 1837.52 | 103.003 | 85.5472 | 207.81  | 88.796   | 63.9483 | 91.8998 | 59.9817 | 59.9817  | 125.25  | 95.137  | 95.137  |         |
| LAMP3    | 47.2828 | 46.6682 | 128.432 | 134.784 | 120.257 | 130.305 | 368.632   | 165.584 | 264.04  | 132.201 | 120.826 | 418.71  | 38.7623 | 31.7717 | 113.141 | 104.114  | 235.653 | 81.9463 | 130.06  | 54.070   | 260.821 | 260.821 |         |         |
| LAT      | 157.413 | 133.151 | 111.423 | 322.948 | 566.61  | 3282.26 | 1447.74   | 8480.62 | 6300.77 | 2738.32 | 1722.58 | 1282.25 | 239.583 | 603.686 | 162.813 | 181.953  | 205.265 | 21.7147 | 37.876  | 247.747  | 405.203 | 209.655 | 209.655 |         |
| LCK      | 337.44  | 327.11  | 40.8098 | 8763.86 | 9848.35 | 7786.12 | 4042.38   | 9578.94 | 37.674  | 42.9961 | 3604.57 | 260.216 | 80.7588 | 64.4552 | 25.9955 | 22.8597  | 43.7917 | 51.636  | 33.996  | 20.9497  | 245.733 | 186.869 | 186.869 |         |
| LEF1     | 30.9082 | 28.4666 | 56.4812 | 120.84  | 270.472 | 1154.22 | 41.9288   | 495.873 | 364.873 | 144.315 | 115.833 | 12.5416 | 11.5183 | 11.8316 | 15.8062 | 11.6118  | 16.181  | 20.3309 | 18.4944 | 10.7102  | 82.1975 | 82.1975 |         |         |
| LHCGR    | 154.689 | 195.379 | 59.3994 | 93.9874 | 24.4663 | 8.2558  | 5.9899    | 9.91794 | 139.079 | 126.934 | 21.748  | 26.0678 | 11.4701 | 31.589  | 23.0381 | 22.0316  | 20.6374 | 21.3651 | 31.7528 | 22.2362  | 51.2046 | 116.416 | 116.416 |         |
| LLR2A    | 20.8919 | 19.1715 | 13.2373 | 20.1625 | 27.3996 | 18.0226 | 15.7237   | 14.6382 | 15.5879 | 151.849 | 101.395 | 38.7711 | 1764.82 | 852.08  | 317.686 | 220.179  | 135.314 | 67.5687 | 133.875 | 101.1    | 283.331 | 249.738 | 249.738 |         |
| LLR2B    | 17.1504 | 17.1504 | 17.1504 | 9.2114  | 17.1504 | 9.2114  | 17.1504   | 9.2114  | 17.1504 | 9.2114  | 17.1504 | 9.2114  | 17.1504 | 9.2114  | 17.1504 | 9.2114   | 17.1504 | 9.2114  | 17.1504 | 9.2114   | 17.1504 | 9.2114  | 9.2114  |         |
| LLR4A    | 33.0212 | 11.7108 | 65.0787 | 12.7827 | 17.4575 | 57.8488 | 50.0191   | 40.1593 | 19.8483 | 18.1212 | 65.6877 | 44.9159 | 42.9501 | 38.5861 | 34.1614 | 31.114   | 15.2038 | 8.33105 | 10.3711 | 10.5327  | 63.1084 | 63.1084 | 63.1084 |         |
| LLR4B    | 30.8866 | 28.114  | 15.5661 | 25.5472 | 6.64369 | 9.99668 | 9.08561   | 12.4368 | 61.8932 | 357.619 | 20.172  | 36.9093 | 3344.12 | 541.407 | 47.965  | 118.853  | 250.193 | 292.791 | 334.358 | 328.451  | 101.335 | 290.594 | 290.594 |         |
| LIME1    | 23.9209 | 43.8231 | 1021.39 | 128.773 | 99.055  | 122.616 | 171.907   | 801.887 | 81.3714 | 666.809 | 181.478 | 47.4626 | 78.1625 | 41.8288 | 34.537  | 50.3354  | 42.4277 | 48.5118 | 45.0411 | 104.288  | 52.9652 | 79.5383 | 79.5383 |         |
| LINC0059 | 15.983  | 18.3267 | 7.21404 | 6.84173 | 60.4387 | 3.68102 | 3.72054   | 33.9572 | 12.935  | 65.4169 | 128.014 | 72.7276 | 23.1863 | 11.3705 | 87.5607 | 126.347  | 7.57251 | 6.36978 | 66.9801 | 31.3742  | 142.381 | 20.7146 | 20.7146 |         |
| LINC0092 | 675.122 | 227.587 | 145.956 | 136.812 | 10.4641 | 146.144 | 22.7915</ |         |         |         |         |         |         |         |         |          |         |         |         |          |         |         |         |         |

|         |         |         |         |          |         |          |           |         |         |         |         |         |         |         |         |         |         |         |         |         |         |         |
|---------|---------|---------|---------|----------|---------|----------|-----------|---------|---------|---------|---------|---------|---------|---------|---------|---------|---------|---------|---------|---------|---------|---------|
| RALGPS2 | 1597.11 | 1305.48 | 112.819 | 57.0268  | 40.2571 | 23.4223  | 36.8021   | 28.212  | 98.9013 | 85.4811 | 54.5636 | 32.5413 | 44.86   | 27.2458 | 22.0316 | 63.4436 | 37.7035 | 39.5414 | 44.0888 | 47.5618 | 56.9276 | 109.43  |
| RAS3A   | 10.5615 | 24.235  | 13.1402 | 27.0981  | 156.482 | 327.847  | 24.5742   | 71.2289 | 79.6063 | 98.9799 | 21.79   | 65.3311 | 93.3435 | 21.3644 | 14.4311 | 115.94  | 17.299  | 12.3276 | 15.3721 | 19.0983 | 26.6479 | 19.4265 |
| RASGRP2 | 5911.21 | 5135.51 | 68.8116 | 2427.95  | 4016.52 | 2855.39  | 121.34    | 169.599 | 1173.44 | 1363.76 | 256.538 | 759.799 | 41.209  | 120.84  | 102.042 | 65.8803 | 130.574 | 281.324 | 209.593 | 156.499 | 1260.17 | 1260.17 |
| RASGRP3 | 458.36  | 578.453 | 325.41  | 16.228   | 28.7949 | 13.6687  | 13.7435   | 15.3904 | 35.1489 | 16.027  | 15.5115 | 19.0711 | 11.4392 | 74.317  | 552.033 | 1.32217 | 986.072 | 1037.51 | 57.225  | 90.1858 | 77.0018 | 15.8927 |
| RASFA   | 22.6771 | 18.661  | 15.1179 | 22.9819  | 29.2554 | 16.6696  | 23.4877   | 25.7631 | 87.8215 | 20.6472 | 228.528 | 146.196 | 672.104 | 501.626 | 3036.44 | 560.785 | 657.841 | 2481.69 | 39.5302 | 30.1934 | 15.5773 | 37.7189 |
| RANSA   | 46.6661 | 40.6645 | 41.2995 | 155.03   | 219.644 | 99.8666  | 193.094   | 28.8125 | 32.67   | 28.3536 | 7.23561 | 25.0117 | 41.6834 | 54.9882 | 37.6006 | 28.6715 | 30.5551 | 10.627  | 6.23015 | 35.0728 | 10.9194 | 5.26993 |
| REN     | 63.7557 | 51.2803 | 391.964 | 30.7495  | 76.8134 | 42.4701  | 37.2987   | 35.7949 | 74.051  | 25.6337 | 26.149  | 246.263 | 31.4489 | 30.597  | 29.9437 | 26.0311 | 25.3695 | 25.1865 | 18.8759 | 51.6107 | 33.5244 | 43.9834 |
| RENBP   | 53.6055 | 41.6905 | 23.1549 | 45.5491  | 37.113  | 34.3453  | 40.6149   | 18.3336 | 33.375  | 37.6646 | 20.4386 | 34.3453 | 215.088 | 433.093 | 777.77  | 1584.31 | 205.937 | 113.646 | 101.644 | 192.926 | 306.39  | 77.276  |
| REPS2   | 40.3629 | 27.9527 | 79.2029 | 13.8876  | 12.0895 | 18.9522  | 8.28887   | 18.5713 | 22.28   | 19.4309 | 16.0062 | 21.7177 | 153.288 | 14.4958 | 9.78903 | 117.231 | 46.4036 | 43.1156 | 108.25  | 19.052  | 735.572 | 1345.64 |
| RGSI    | 180.199 | 246.272 | 92.0202 | 646.722  | 215.673 | 1496.611 | 1321.5    | 1981.05 | 1384.65 | 110.307 | 147.042 | 255.51  | 64.4417 | 147.149 | 184.994 | 63.8235 | 62.1036 | 33.5357 | 507.24  | 474.485 | 6082.81 | 111.35  |
| RGS13   | 71.2657 | 70.4943 | 269.813 | 26.821   | 11.2333 | 22.227   | 7.84398   | 79.7229 | 37.7212 | 60.0098 | 38.2712 | 59.0437 | 78.736  | 9.04132 | 3.82861 | 4.0249  | 34.6737 | 2306.94 | 34.6737 | 2306.94 | 15.733  | 19.8344 |
| RNASE2  | 186.472 | 164.907 | 350.768 | 216.873  | 156.133 | 189.7636 | 102.519   | 83.759  | 107.063 | 600.512 | 663.055 | 230.075 | 361.284 | 144.229 | 407.223 | 677.714 | 143.263 | 145.714 | 1975.14 | 222.69  | 85.275  | 672.191 |
| RNASE5  | 1799.68 | 1157.23 | 2281.11 | 17.0513  | 21.1314 | 64.4438  | 8.63635   | 22.1728 | 11.3732 | 77.722  | 84.5879 | 14.3677 | 4038.45 | 2527.65 | 306.169 | 5075.1  | 8418.34 | 853.615 | 681.365 | 506.467 | 144.002 | 213.003 |
| RPL10L  | 36.0087 | 70.343  | 311.315 | 321.35   | 328.074 | 588.702  | 346.941   | 160.245 | 144.445 | 184.475 | 91.2767 | 98.9284 | 95.7049 | 57.3155 | 53.6494 | 70.3334 | 26.9817 | 75.5232 | 182.734 | 140.712 | 24.8215 | 13.6945 |
| RPL3P7  | 76.8505 | 379.486 | 1151.46 | 1290.95  | 447.773 | 3370.86  | 1067.78   | 2289.14 | 142.679 | 649.198 | 256.676 | 55.1036 | 109.461 | 25.6758 | 39.6473 | 31.9351 | 20.7984 | 74.7272 | 459.178 | 150.247 | 266.182 | 142.538 |
| RPLP2   | 12.8152 | 12.6725 | 546.135 | 10.8322  | 10.2629 | 14.3173  | 378.729   | 17.2718 | 29.8665 | 9.38933 | 20.597  | 75.4449 | 288.345 | 98.8497 | 11.7281 | 14.5147 | 35.4971 | 11.8487 | 26.9147 | 173.353 | 930.231 | 274.094 |
| RRP9    | 95.4453 | 16.3321 | 11.4758 | 92.3651  | 116.424 | 49.5309  | 524.282   | 82.5653 | 11.6719 | 62.7399 | 53.2923 | 186.620 | 36.1323 | 164.951 | 183.181 | 91.1632 | 29.2975 | 16.3481 | 11.0627 | 126.396 | 49.908  | 9.94509 |
| RSAD2   | 215.228 | 211.215 | 215.517 | 164.102  | 230.681 | 222.858  | 149.426   | 101.608 | 852.591 | 390.708 | 300.348 | 666.804 | 334.986 | 78.8724 | 6976.48 | 140.167 | 113.741 | 132.553 | 399.435 | 312.62  | 1070.32 | 713.359 |
| RYS1    | 108.558 | 115.914 | 61.532  | 134.679  | 13.3104 | 134.919  | 161.981   | 214.172 | 1289.51 | 142.581 | 38.1114 | 76.7444 | 128.932 | 205.797 | 72.9949 | 102.3   | 117.169 | 105.54  | 15.7971 | 55.4883 | 75.752  | 199.924 |
| S100A12 | 190.663 | 205.61  | 206.614 | 103.089  | 122.046 | 79.9668  | 77.6091   | 114.327 | 93.8562 | 67.5556 | 1088.21 | 220.626 | 111.497 | 143.016 | 25.83   | 123.701 | 132.82  | 138.87  | 105.417 | 976.508 | 374.452 | 8781.77 |
| S1PMS   | 7.99712 | 7.02749 | 7.65618 | 41.049   | 8.4517  | 6.54773  | 6.84333   | 8.88663 | 5.61564 | 10.0671 | 587.658 | 175.698 | 4.90063 | 6.63364 | 6.43369 | 6.92011 | 7.66804 | 8.97421 | 9.12493 | 8.09185 | 9.35291 |         |
| SAMSNS1 | 197.088 | 441.901 | 574.922 | 794.816  | 609.276 | 1660.13  | 2859.41   | 577.401 | 1973.85 | 1571.7  | 1266.57 | 2876.6  | 1412.29 | 645.689 | 5090.53 | 3133.9  | 2070.55 | 707.18  | 6327.08 | 4.9609  | 11409.5 | 1654.1  |
| SCN9A   | 7.19229 | 7.90594 | 8.49398 | 5.5994   | 20.4394 | 6.40933  | 6.27698   | 22.1418 | 39.6939 | 56.5436 | 11.2458 | 10.5941 | 6.12899 | 6.72086 | 11.1605 | 88.1004 | 304.809 | 6.08488 | 61.2251 | 108.671 | 17.7601 | 15.2382 |
| SEC31B  | 64.8014 | 51.0818 | 110.239 | 42.4732  | 539.266 | 63.7902  | 23.5721   | 163.901 | 10.735  | 58.5038 | 248.32  | 30.9473 | 136.549 | 33.1826 | 58.5085 | 492.069 | 38.3377 | 29.7514 | 207.473 | 231.166 | 179.502 | 40.6762 |
| SELL    | 111.022 | 8002.61 | 376.905 | 7418.86  | 8005.46 | 710.611  | 2531.5    | 4188.18 | 5165.45 | 10585.6 | 5741.49 | 1590.26 | 74.734  | 103.92  | 234.172 | 93.9412 | 121.954 | 137.33  | 355.99  | 286.717 | 3001.39 | 1374.94 |
| S- Sep  | 10.8993 | 18.0659 | 29.873  | 37.8866  | 37.8866 | 16.12    | 92.097    | 18.9654 | 14.394  | 14.394  | 115.127 | 107.755 | 16.504  | 14.4027 | 17.4563 | 14.7934 | 14.3202 | 25.8689 | 23.9839 | 51.899  | 15.733  | 15.733  |
| S- Sep  | 27.7175 | 22.8798 | 37.6536 | 31.0278  | 35.0009 | 35.9388  | 27.6167   | 126.645 | 33.1677 | 30.066  | 26.9758 | 67.2842 | 15.6221 | 27.1893 | 183.066 | 72.0103 | 34.6678 | 19.3327 | 41.7782 | 267.468 | 24.112  | 21.7778 |
| SERGEF  | 15.6914 | 11.986  | 11.0903 | 63.6079  | 264.236 | 235.879  | 16.2288   | 189.143 | 18.5212 | 17.2702 | 64.8189 | 41.5765 | 20.4217 | 24.0606 | 113.605 | 103.011 | 16.8398 | 19.0611 | 89.9832 | 39.4062 | 19.9948 | 16.7439 |
| SH2D1A  | 30.8664 | 23.7458 | 17.0246 | 12.0249  | 91.037  | 158.549  | 1484.48   | 2984.36 | 2057.44 | 1522.34 | 1.296   | 844.708 | 18.418  | 17.338  | 17.5347 | 11.3907 | 16.5125 | 27.6285 | 22.1716 | 43.9516 | 29.1315 | 41.8751 |
| SIGLEC1 | 258.3   | 149.399 | 98.7201 | 81.5005  | 55.5443 | 91.0726  | 46.5724   | 55.1357 | 132.288 | 118.122 | 98.8058 | 88.8159 | 279.322 | 116.43  | 620.279 | 3457.59 | 404.608 | 2742.91 | 185.663 | 145.666 | 126.374 | 245.932 |
| SIK1    | 5471.7  | 5620.45 | 55.225  | 12.192   | 49.4207 | 41.0037  | 162.041   | 4922.27 | 942.261 | 393.187 | 457.652 | 248.295 | 544.809 | 146.153 | 292.992 | 111.244 | 100.718 | 228.177 | 59.768  | 326.996 | 2371.94 | 401.547 |
| SIRPG   | 74.1126 | 71.7336 | 55.7452 | 1310.34  | 1078.57 | 1148.81  | 1393.21   | 3092.33 | 32.278  | 73.827  | 94.3654 | 57.8927 | 18.3654 | 11.737  | 234.172 | 93.9412 | 121.954 | 137.33  | 355.99  | 286.717 | 3001.39 | 1374.94 |
| SIT1    | 759.159 | 18.0659 | 15.8787 | 16.12    | 92.097  | 16.12    | 92.097    | 18.9654 | 14.394  | 14.394  | 115.127 | 107.755 | 16.504  | 14.4027 | 17.4563 | 14.7934 | 14.3202 | 25.8689 | 23.9839 | 51.899  | 15.733  | 15.733  |
| SITA    | 4.91436 | 2.77047 | 3.23618 | 2.22603  | 15.8936 | 1.65886  | 353.189   | 5.8275  | 19.2067 | 10.1915 | 41.3564 | 3.19489 | 4.37549 | 6.57229 | 15.6035 | 2.81889 | 4.75106 | 30.7677 | 18.0182 | 5.45324 | 2.0938  |         |
| SKAMP1  | 1378.74 | 556.927 | 875.146 | 2273.26  | 2670.87 | 2395.68  | 814.249   | 2389.17 | 5831.85 | 2886.35 | 2037.38 | 153.144 | 155.106 | 188.029 | 115.435 | 100.357 | 168.339 | 153.529 | 498.346 | 490.989 | 445.017 | 388.847 |
| SLAMF1  | 762.035 | 515.487 | 1019.77 | 496.422  | 449.836 | 1081.53  | 2005.43   | 1074.94 | 1504.85 | 1075.82 | 114.124 | 115.62  | 111.909 | 131.709 | 6057.92 | 845.507 | 126.411 | 801.522 | 58.056  | 157.558 | 243.983 | 260.858 |
| SLAMFR  | 156.65  | 135.992 | 97.4207 | 107.641  | 72.6907 | 101.406  | 85.9785   | 48.4924 | 37.2438 | 21.1302 | 17.0426 | 95.174  | 166.406 | 2.483   | 663.473 | 1407.52 | 2859.32 | 358.466 | 237.642 | 389.302 | 111.152 | 120.650 |
| SLC12A1 | 89.4899 | 48.9366 | 9.17429 | 10.7794  | 13.5972 | 11.2033  | 1.8637    | 3.0215  | 31.2921 | 31.9203 | 31.9203 | 31.9203 | 3.35313 | 3.69927 | 5.19909 | 17.1207 | 2.70881 | 1.78681 | 5.25015 | 18.1912 | 24.7591 | 82.9922 |
| SLC12A6 | 7.25582 | 8.43487 | 52.0634 | 32.11921 | 3.74022 | 3.74022  | 3.74022   | 3.74022 | 3.74022 | 3.74022 | 3.74022 | 3.74022 | 3.74022 | 3.74022 | 3.74022 | 3.74022 | 3.74022 | 3.74022 | 3.74022 | 3.74022 | 3.74022 | 3.74022 |
| SLC15A3 | 9.05817 | 20.2449 | 10.2839 | 10.576   | 27.125  | 19.3645  | 13.0927   | 19.7654 | 9.87289 | 74.5084 | 11.452  | 34.089  | 82.9364 | 45.6407 | 3860.54 | 3890.34 | 3688.67 | 4650.12 | 321.295 | 43.816  | 50.988  | 143.04  |
| SLC22A  | 112.564 | 313.23  | 42.9022 | 43.856   | 80.5592 | 15.5899  | 24.8858   | 11.0789 | 11.5414 | 21.3152 | 10.7367 | 125.466 | 623.894 | 328.746 | 6057.92 | 579.734 | 500.226 | 192.818 | 552.658 | 528.636 | 14.116  | 12.747  |
| SLC7A10 | 66.7807 | 84.617  | 10.2633 | 33.201   | 19.6695 | 53.1212  | 44.819    | 62.6562 | 23.5688 | 14.7767 | 31.8504 | 24.3686 | 34.3089 | 5.2921  | 34.7291 | 26.3219 | 37.7982 | 105.054 | 47.677  | 11.7442 | 34.6614 | 50.9434 |
| SLC05A1 | 118.73  | 108.129 | 82.9399 | 30.0687  | 55.6925 | 70.9767  | 41.7937   | 15.5781 | 11.3233 | 35.3305 | 73.0234 | 49.927  | 40.6934 | 42.8667 | 954.038 | 39.7571 | 42.9359 | 105.068 | 14.9805 | 26.3143 | 29.1103 | 31.437  |
| SMPD3   | 70.721  | 140.541 | 328.737 | 70.1268  | 148.972 | 47.6216  | 17.2585   | 51.6154 | 27.3493 | 99.227  | 89.684  | 154.573 | 35.663  | 44.175  | 66.6362 | 116.467 | 23.594  | 53.3365 | 15.1724 | 30.9053 | 168.573 | 246.551 |
| SMPDL3B | 2.74237 | 3.0344  | 6.71178 | 3.73038  | 5.87719 | 3.84718  | 4.62442   | 4.91436 | 6.38705 | 9.07379 | 4.98851 | 4.18249 | 4.61674 | 4.12578 | 4.75106 | 4.03108 | 3.67896 | 4.24831 | 4.79592 | 5.2825  | 15.265  | 63.9158 |
| SOC1    | 27.1479 | 25.0917 | 16.8555 | 160.803  | 64.4438 | 118.717  | 1034.18</ |         |         |         |         |         |         |         |         |         |         |         |         |         |         |         |

**Table S3** Geneset for ssGSEA

| Metagene | Cell type | Immunity |
|----------|-----------|----------|
| ADAM28   | Activated | Adaptive |
| CD180    | Activated | Adaptive |
| CD79B    | Activated | Adaptive |
| BLK      | Activated | Adaptive |
| CD19     | Activated | Adaptive |
| MS4A1    | Activated | Adaptive |
| TNFRSF17 | Activated | Adaptive |
| IGHM     | Activated | Adaptive |
| GNG7     | Activated | Adaptive |
| MICAL3   | Activated | Adaptive |
| SPIB     | Activated | Adaptive |
| HLA-DOB  | Activated | Adaptive |
| IGKC     | Activated | Adaptive |
| PNOC     | Activated | Adaptive |
| FCRL2    | Activated | Adaptive |
| BACH2    | Activated | Adaptive |
| CR2      | Activated | Adaptive |
| TCL1A    | Activated | Adaptive |
| AKNA     | Activated | Adaptive |
| ARHGAP25 | Activated | Adaptive |
| CCL21    | Activated | Adaptive |
| CD27     | Activated | Adaptive |
| CD38     | Activated | Adaptive |
| CLEC17A  | Activated | Adaptive |
| CLEC9A   | Activated | Adaptive |
| CLECL1   | Activated | Adaptive |
| AIM2     | Activated | Adaptive |
| BIRC3    | Activated | Adaptive |
| BRIP1    | Activated | Adaptive |
| CCL20    | Activated | Adaptive |
| CCL4     | Activated | Adaptive |
| CCL5     | Activated | Adaptive |
| CCNB1    | Activated | Adaptive |
| CCR7     | Activated | Adaptive |
| DUSP2    | Activated | Adaptive |
| ESCO2    | Activated | Adaptive |
| ETS1     | Activated | Adaptive |
| EXO1     | Activated | Adaptive |
| EXOC6    | Activated | Adaptive |
| IARS     | Activated | Adaptive |
| ITK      | Activated | Adaptive |
| KIF11    | Activated | Adaptive |
| KNTC1    | Activated | Adaptive |
| NUF2     | Activated | Adaptive |
| PRC1     | Activated | Adaptive |
| PSAT1    | Activated | Adaptive |
| RGS1     | Activated | Adaptive |
| RTKN2    | Activated | Adaptive |
| SAMSN1   | Activated | Adaptive |
| SELL     | Activated | Adaptive |

|           |                    |
|-----------|--------------------|
| TRAT1     | Activated Adaptive |
| ADRM1     | Activated Adaptive |
| AHSA1     | Activated Adaptive |
| C1GALT1C1 | Activated Adaptive |
| CCT6B     | Activated Adaptive |
| CD37      | Activated Adaptive |
| CD3D      | Activated Adaptive |
| CD3E      | Activated Adaptive |
| CD3G      | Activated Adaptive |
| CD69      | Activated Adaptive |
| CD8A      | Activated Adaptive |
| CETN3     | Activated Adaptive |
| CSE1L     | Activated Adaptive |
| GEMIN6    | Activated Adaptive |
| GNLY      | Activated Adaptive |
| GPT2      | Activated Adaptive |
| GZMA      | Activated Adaptive |
| GZMH      | Activated Adaptive |
| GZMK      | Activated Adaptive |
| IL2RB     | Activated Adaptive |
| LCK       | Activated Adaptive |
| MPZL1     | Activated Adaptive |
| NKG7      | Activated Adaptive |
| PIK3IP1   | Activated Adaptive |
| PTRH2     | Activated Adaptive |
| TIMM13    | Activated Adaptive |
| ZAP70     | Activated Adaptive |
| ABHD3     | Central mεAdaptive |
| AHNAK     | Central mεAdaptive |
| ANXA2P2   | Central mεAdaptive |
| AQP3      | Central mεAdaptive |
| ATHL1     | Central mεAdaptive |
| BMI1      | Central mεAdaptive |
| BZW2      | Central mεAdaptive |
| CD63      | Central mεAdaptive |
| COL4A1    | Central mεAdaptive |
| CYLD      | Central mεAdaptive |
| ELMO2     | Central mεAdaptive |
| FYN       | Central mεAdaptive |
| GLIPR1    | Central mεAdaptive |
| GSS       | Central mεAdaptive |
| IFITM2    | Central mεAdaptive |
| ITGB1     | Central mεAdaptive |
| ITGB2     | Central mεAdaptive |
| KLF5      | Central mεAdaptive |
| LSP1      | Central mεAdaptive |
| NDUFB9    | Central mεAdaptive |
| PKM2      | Central mεAdaptive |
| SFXN3     | Central mεAdaptive |
| SIRPG     | Central mεAdaptive |
| SMAD4     | Central mεAdaptive |

|           |                    |
|-----------|--------------------|
| STX4      | Central mAdaptive  |
| TRADD     | Central mAdaptive  |
| VIM       | Central mAdaptive  |
| XRCC6     | Central mAdaptive  |
| ACTN4     | Central mAdaptive  |
| ADAM12    | Central mAdaptive  |
| ADCY9     | Central mAdaptive  |
| F13A1     | Central mAdaptive  |
| FCER1G    | Central mAdaptive  |
| FCGR3B    | Central mAdaptive  |
| FGF7      | Central mAdaptive  |
| FKBP4     | Central mAdaptive  |
| GLUD1     | Central mAdaptive  |
| GM2A      | Central mAdaptive  |
| GUSB      | Central mAdaptive  |
| IL1RN     | Central mAdaptive  |
| NOL11     | Central mAdaptive  |
| NTRK1     | Central mAdaptive  |
| RARA      | Central mAdaptive  |
| RNF128    | Central mAdaptive  |
| SIGLEC1   | Central mAdaptive  |
| TNFRSF11A | Central mAdaptive  |
| TOX4      | Central mAdaptive  |
| UBA52     | Central mAdaptive  |
| ULBP1     | Central mAdaptive  |
| ATM       | Effector nAdaptive |
| CASP3     | Effector nAdaptive |
| CASQ1     | Effector nAdaptive |
| CD300E    | Effector nAdaptive |
| DARS      | Effector nAdaptive |
| DOCK9     | Effector nAdaptive |
| EXOSC9    | Effector nAdaptive |
| EZH2      | Effector nAdaptive |
| GDE1      | Effector nAdaptive |
| IL34      | Effector nAdaptive |
| NCOA4     | Effector nAdaptive |
| NEFL      | Effector nAdaptive |
| PDGFRL    | Effector nAdaptive |
| PTGS1     | Effector nAdaptive |
| REPS1     | Effector nAdaptive |
| SCG2      | Effector nAdaptive |
| SDPR      | Effector nAdaptive |
| SIGLEC14  | Effector nAdaptive |
| SIGLEC6   | Effector nAdaptive |
| TAL1      | Effector nAdaptive |
| TFEC      | Effector nAdaptive |
| TIPIN     | Effector nAdaptive |
| TPK1      | Effector nAdaptive |
| UQCRB     | Effector nAdaptive |
| USP9Y     | Effector nAdaptive |
| WIPF1     | Effector nAdaptive |

|          |                    |
|----------|--------------------|
| ZCRB1    | Effector nAdaptive |
| ACAP1    | Effector nAdaptive |
| APOL3    | Effector nAdaptive |
| ARHGAP10 | Effector nAdaptive |
| ATP10D   | Effector nAdaptive |
| C3AR1    | Effector nAdaptive |
| CCR5     | Effector nAdaptive |
| CD160    | Effector nAdaptive |
| CD55     | Effector nAdaptive |
| CFLAR    | Effector nAdaptive |
| CMKLR1   | Effector nAdaptive |
| DAPP1    | Effector nAdaptive |
| FCRL6    | Effector nAdaptive |
| FLT3LG   | Effector nAdaptive |
| GZMM     | Effector nAdaptive |
| HAPLN3   | Effector nAdaptive |
| HLA-DMB  | Effector nAdaptive |
| HLA-DPA1 | Effector nAdaptive |
| HLA-DPB1 | Effector nAdaptive |
| IFI16    | Effector nAdaptive |
| LIME1    | Effector nAdaptive |
| LTK      | Effector nAdaptive |
| NFKBIA   | Effector nAdaptive |
| SETD7    | Effector nAdaptive |
| SIK1     | Effector nAdaptive |
| TRIB2    | Effector nAdaptive |
| ACP5     | Gamma deltAdaptive |
| AQP9     | Gamma deltAdaptive |
| BTN3A2   | Gamma deltAdaptive |
| Clorf54  | Gamma deltAdaptive |
| CARD8    | Gamma deltAdaptive |
| CCL18    | Gamma deltAdaptive |
| CD209    | Gamma deltAdaptive |
| CD33     | Gamma deltAdaptive |
| CD36     | Gamma deltAdaptive |
| CDK5     | Gamma deltAdaptive |
| IL10RB   | Gamma deltAdaptive |
| KLRF1    | Gamma deltAdaptive |
| LGALS1   | Gamma deltAdaptive |
| MAPK7    | Gamma deltAdaptive |
| KLHL7    | Gamma deltAdaptive |
| KRT80    | Gamma deltAdaptive |
| LAMC1    | Gamma deltAdaptive |
| LCORL    | Gamma deltAdaptive |
| LMNB1    | Gamma deltAdaptive |
| MEIS3P1  | Gamma deltAdaptive |
| MPL      | Gamma deltAdaptive |
| FABP1    | Gamma deltAdaptive |
| FABP5    | Gamma deltAdaptive |
| FADD     | Gamma deltAdaptive |
| MFAP3L   | Gamma deltAdaptive |

|          |            |           |
|----------|------------|-----------|
| MINPP1   | Gamma del  | Adaptive  |
| RPS24    | Gamma del  | Adaptive  |
| RPS7     | Gamma del  | Adaptive  |
| RPS9     | Gamma del  | Adaptive  |
| DBNL     | Gamma del  | Adaptive  |
| CCL13    | Gamma del  | Adaptive  |
| CD22     | Immature   | Adaptive  |
| CYBB     | Immature   | Adaptive  |
| FAM129C  | Immature   | Adaptive  |
| FCRL1    | Immature   | Adaptive  |
| FCRL3    | Immature   | Adaptive  |
| FCRL5    | Immature   | Adaptive  |
| FCRLA    | Immature   | Adaptive  |
| HDAC9    | Immature   | Adaptive  |
| HLA-DQA1 | Immature   | Adaptive  |
| HVCN1    | Immature   | Adaptive  |
| KIAA0226 | Immature   | Adaptive  |
| NCF1     | Immature   | Adaptive  |
| NCF1B    | Immature   | Adaptive  |
| P2RY10   | Immature   | Adaptive  |
| SP100    | Immature   | Adaptive  |
| TXNIP    | Immature   | Adaptive  |
| STAP1    | Immature   | Adaptive  |
| TAGAP    | Immature   | Adaptive  |
| ZCCHC2   | Immature   | Adaptive  |
| AICDA    | Memory B   | cAdaptive |
| CCNA2    | Memory B   | cAdaptive |
| CDKN3    | Memory B   | cAdaptive |
| CLCN5    | Memory B   | cAdaptive |
| ENPP1    | Memory B   | cAdaptive |
| FCER1A   | Memory B   | cAdaptive |
| FCRL4    | Memory B   | cAdaptive |
| MYC      | Memory B   | cAdaptive |
| RUNX2    | Memory B   | cAdaptive |
| SORL1    | Memory B   | cAdaptive |
| SOX5     | Memory B   | cAdaptive |
| STAT5A   | Memory B   | cAdaptive |
| STAT5B   | Memory B   | cAdaptive |
| TLR9     | Memory B   | cAdaptive |
| CCL3L1   | Regulatory | Adaptive  |
| CD72     | Regulatory | Adaptive  |
| CLEC5A   | Regulatory | Adaptive  |
| FOXP3    | Regulatory | Adaptive  |
| ITGA4    | Regulatory | Adaptive  |
| L1CAM    | Regulatory | Adaptive  |
| LIPA     | Regulatory | Adaptive  |
| LRP1     | Regulatory | Adaptive  |
| LRRC42   | Regulatory | Adaptive  |
| MARCO    | Regulatory | Adaptive  |
| MMP12    | Regulatory | Adaptive  |
| MNDA     | Regulatory | Adaptive  |

|          |                    |
|----------|--------------------|
| MRC1     | RegulatoryAdaptive |
| MS4A6A   | RegulatoryAdaptive |
| PELO     | RegulatoryAdaptive |
| PLEK     | RegulatoryAdaptive |
| PRSS23   | RegulatoryAdaptive |
| PTGIR    | RegulatoryAdaptive |
| ST8SIA4  | RegulatoryAdaptive |
| STAB1    | RegulatoryAdaptive |
| B3GAT1   | T folliculAdaptive |
| CDK5R1   | T folliculAdaptive |
| PDCD1    | T folliculAdaptive |
| BCL6     | T folliculAdaptive |
| CD200    | T folliculAdaptive |
| CD83     | T folliculAdaptive |
| CD84     | T folliculAdaptive |
| FGF2     | T folliculAdaptive |
| GPR18    | T folliculAdaptive |
| CEBPA    | T folliculAdaptive |
| CECR1    | T folliculAdaptive |
| CLEC10A  | T folliculAdaptive |
| CLEC4A   | T folliculAdaptive |
| CSF1R    | T folliculAdaptive |
| CTSS     | T folliculAdaptive |
| DMN      | T folliculAdaptive |
| DPP4     | T folliculAdaptive |
| LRRRC32  | T folliculAdaptive |
| MC5R     | T folliculAdaptive |
| MICA     | T folliculAdaptive |
| NCAM1    | T folliculAdaptive |
| NCR2     | T folliculAdaptive |
| NRP1     | T folliculAdaptive |
| PDCD1LG2 | T folliculAdaptive |
| PDCD6    | T folliculAdaptive |
| PRDX1    | T folliculAdaptive |
| RAE1     | T folliculAdaptive |
| RAET1E   | T folliculAdaptive |
| SIGLEC7  | T folliculAdaptive |
| SIGLEC9  | T folliculAdaptive |
| TYRO3    | T folliculAdaptive |
| CHST12   | T folliculAdaptive |
| CLIC3    | T folliculAdaptive |
| IVNS1ABP | T folliculAdaptive |
| KIR2DL2  | T folliculAdaptive |
| LGMN     | T folliculAdaptive |
| CD70     | Type 1 T fAdaptive |
| TBX21    | Type 1 T fAdaptive |
| ADAM8    | Type 1 T fAdaptive |
| AHCYL2   | Type 1 T fAdaptive |
| ALCAM    | Type 1 T fAdaptive |
| B3GALNT1 | Type 1 T fAdaptive |
| BBS12    | Type 1 T fAdaptive |

|          |                    |
|----------|--------------------|
| BST1     | Type 1 T fAdaptive |
| CD151    | Type 1 T fAdaptive |
| CD47     | Type 1 T fAdaptive |
| CD48     | Type 1 T fAdaptive |
| CD52     | Type 1 T fAdaptive |
| CD53     | Type 1 T fAdaptive |
| CD59     | Type 1 T fAdaptive |
| CD6      | Type 1 T fAdaptive |
| CD68     | Type 1 T fAdaptive |
| CD7      | Type 1 T fAdaptive |
| CD96     | Type 1 T fAdaptive |
| CFHR3    | Type 1 T fAdaptive |
| CHRM3    | Type 1 T fAdaptive |
| CLEC7A   | Type 1 T fAdaptive |
| COL23A1  | Type 1 T fAdaptive |
| COL4A4   | Type 1 T fAdaptive |
| COL5A3   | Type 1 T fAdaptive |
| DAB1     | Type 1 T fAdaptive |
| DLEU7    | Type 1 T fAdaptive |
| DOC2B    | Type 1 T fAdaptive |
| EMP1     | Type 1 T fAdaptive |
| F12      | Type 1 T fAdaptive |
| FURIN    | Type 1 T fAdaptive |
| GAB3     | Type 1 T fAdaptive |
| GATM     | Type 1 T fAdaptive |
| GFPT2    | Type 1 T fAdaptive |
| GPR25    | Type 1 T fAdaptive |
| GREM2    | Type 1 T fAdaptive |
| HAVCR1   | Type 1 T fAdaptive |
| HSD11B1  | Type 1 T fAdaptive |
| HUNK     | Type 1 T fAdaptive |
| IGF2     | Type 1 T fAdaptive |
| RCSD1    | Type 1 T fAdaptive |
| RYR1     | Type 1 T fAdaptive |
| SAV1     | Type 1 T fAdaptive |
| SELE     | Type 1 T fAdaptive |
| SELP     | Type 1 T fAdaptive |
| SH3KBP1  | Type 1 T fAdaptive |
| SIT1     | Type 1 T fAdaptive |
| SLC35B3  | Type 1 T fAdaptive |
| SIGLEC10 | Type 1 T fAdaptive |
| SKAP1    | Type 1 T fAdaptive |
| THUMPD2  | Type 1 T fAdaptive |
| TIGIT    | Type 1 T fAdaptive |
| ZEB2     | Type 1 T fAdaptive |
| ENC1     | Type 1 T fAdaptive |
| FAM134B  | Type 1 T fAdaptive |
| FBX030   | Type 1 T fAdaptive |
| FCGR2C   | Type 1 T fAdaptive |
| STAC     | Type 1 T fAdaptive |
| LTC4S    | Type 1 T fAdaptive |

|          |                    |
|----------|--------------------|
| MAN1B1   | Type 1 T fAdaptive |
| MDH1     | Type 1 T fAdaptive |
| MMD      | Type 1 T fAdaptive |
| RGS16    | Type 1 T fAdaptive |
| IL12A    | Type 1 T fAdaptive |
| P2RX5    | Type 1 T fAdaptive |
| CD97     | Type 1 T fAdaptive |
| ITGB4    | Type 1 T fAdaptive |
| ICAM3    | Type 1 T fAdaptive |
| METRNL   | Type 1 T fAdaptive |
| TNFRSF1A | Type 1 T fAdaptive |
| IRF1     | Type 1 T fAdaptive |
| HTR2B    | Type 1 T fAdaptive |
| CALD1    | Type 1 T fAdaptive |
| MOCOS    | Type 1 T fAdaptive |
| TRAF3IP2 | Type 1 T fAdaptive |
| TLR8     | Type 1 T fAdaptive |
| TRAF1    | Type 1 T fAdaptive |
| DUSP14   | Type 1 T fAdaptive |
| IL17A    | Type 17 T Adaptive |
| IL17RA   | Type 17 T Adaptive |
| C2CD4A   | Type 17 T Adaptive |
| C2CD4B   | Type 17 T Adaptive |
| CA2      | Type 17 T Adaptive |
| CCDC65   | Type 17 T Adaptive |
| CEACAM3  | Type 17 T Adaptive |
| IL17C    | Type 17 T Adaptive |
| IL17F    | Type 17 T Adaptive |
| IL17RC   | Type 17 T Adaptive |
| IL17RE   | Type 17 T Adaptive |
| IL23A    | Type 17 T Adaptive |
| ILDR1    | Type 17 T Adaptive |
| LONRF3   | Type 17 T Adaptive |
| SH2D6    | Type 17 T Adaptive |
| TNIP2    | Type 17 T Adaptive |
| ABCA1    | Type 17 T Adaptive |
| ABCB1    | Type 17 T Adaptive |
| ADAMTS12 | Type 17 T Adaptive |
| ANK1     | Type 17 T Adaptive |
| ANKRD22  | Type 17 T Adaptive |
| B3GALT2  | Type 17 T Adaptive |
| CAMTA1   | Type 17 T Adaptive |
| CCR9     | Type 17 T Adaptive |
| CD40     | Type 17 T Adaptive |
| GPR44    | Type 17 T Adaptive |
| IFT80    | Type 17 T Adaptive |
| ASB2     | Type 2 T fAdaptive |
| CSRP2    | Type 2 T fAdaptive |
| DAPK1    | Type 2 T fAdaptive |
| DLC1     | Type 2 T fAdaptive |
| DNAJC12  | Type 2 T fAdaptive |

|          |                    |
|----------|--------------------|
| DUSP6    | Type 2 T fAdaptive |
| GNAI1    | Type 2 T fAdaptive |
| LAMP3    | Type 2 T fAdaptive |
| NRP2     | Type 2 T fAdaptive |
| OSBPL1A  | Type 2 T fAdaptive |
| PDE4B    | Type 2 T fAdaptive |
| PHLDA1   | Type 2 T fAdaptive |
| PLA2G4A  | Type 2 T fAdaptive |
| RAB27B   | Type 2 T fAdaptive |
| RBMS3    | Type 2 T fAdaptive |
| RNF125   | Type 2 T fAdaptive |
| TMPRSS3  | Type 2 T fAdaptive |
| GATA3    | Type 2 T fAdaptive |
| BIRC5    | Type 2 T fAdaptive |
| CDC25C   | Type 2 T fAdaptive |
| CDC7     | Type 2 T fAdaptive |
| CENPF    | Type 2 T fAdaptive |
| CXCR6    | Type 2 T fAdaptive |
| DHFR     | Type 2 T fAdaptive |
| EVI5     | Type 2 T fAdaptive |
| GSTA4    | Type 2 T fAdaptive |
| HELLS    | Type 2 T fAdaptive |
| IL26     | Type 2 T fAdaptive |
| LAIR2    | Type 2 T fAdaptive |
| ABCD1    | Activated Innate   |
| C1QC     | Activated Innate   |
| CAPG     | Activated Innate   |
| CCL3L3   | Activated Innate   |
| CD207    | Activated Innate   |
| CD302    | Activated Innate   |
| ATP5B    | Activated Innate   |
| ATP5L    | Activated Innate   |
| ATP6V1A  | Activated Innate   |
| BCL2L1   | Activated Innate   |
| C1QB     | Activated Innate   |
| SNURF    | Activated Innate   |
| SPCS3    | Activated Innate   |
| CCNA1    | Activated Innate   |
| CEACAM8  | Activated Innate   |
| NOS2     | Activated Innate   |
| SRA1     | Activated Innate   |
| TNFRSF6B | Activated Innate   |
| TREM1    | Activated Innate   |
| TREML1   | Activated Innate   |
| RHOA     | Activated Innate   |
| SLC25A37 | Activated Innate   |
| TNFSF14  | Activated Innate   |
| TREML4   | Activated Innate   |
| VNN2     | Activated Innate   |
| XPO6     | Activated Innate   |
| CLEC4C   | Activated Innate   |

|          |                             |
|----------|-----------------------------|
| TNFAIP2  | Activated Innate            |
| UBD      | Activated Innate            |
| ACTR3    | Activated Innate            |
| RAB1A    | Activated Innate            |
| SLA      | Activated Innate            |
| HLA-DQA2 | Activated Innate            |
| SIGLEC5  | Activated Innate            |
| SLAMF9   | Activated Innate            |
| ABAT     | CD56brightInnate            |
| C11orf75 | CD56brightInnate            |
| C5orf15  | CD56brightInnate            |
| CDHR1    | CD56brightInnate            |
| DCAF12   | CD56brightInnate            |
| DYNLL1   | CD56brightInnate            |
| GPR137B  | CD56brightInnate            |
| HCP5     | CD56brightInnate            |
| HDGFRP2  | CD56brightInnate            |
| KRT86    | CD56brightInnate            |
| MLST8    | CD56brightInnate            |
| ELMOD3   | CD56brightInnate            |
| ENTPD5   | CD56brightInnate            |
| FAM119A  | CD56brightInnate            |
| FAM179A  | CD56brightInnate            |
| CLIC2    | CD56brightInnate            |
| COX7A2L  | CD56brightInnate            |
| CREB3L4  | CD56brightInnate            |
| CSF1     | CD56brightInnate            |
| CSNK2A2  | CD56brightInnate            |
| CSTA     | CD56brightInnate            |
| CSTB     | CD56brightInnate            |
| CTPS     | CD56brightInnate            |
| CTSD     | CD56brightInnate            |
| FST      | CD56brightInnate            |
| GATA2    | CD56brightInnate            |
| GMPR     | CD56brightInnate            |
| HDC      | CD56brightInnate            |
| HEY1     | CD56brightInnate            |
| HOXA1    | CD56brightInnate            |
| HS2ST1   | CD56brightInnate            |
| HS3ST1   | CD56brightInnate            |
| BCL11B   | CD56brightInnate            |
| CDH3     | CD56brightInnate            |
| MYL6B    | CD56brightInnate            |
| NAA16    | CD56brightInnate            |
| C1QA     | CD56brightInnate            |
| C1QB     | CD56brightInnate            |
| CYP27B1  | CD56brightInnate            |
| EIF3M    | CD56brightInnate            |
| CYP27A1  | CD56dim n $\epsilon$ Innate |
| DDX55    | CD56dim n $\epsilon$ Innate |
| DYRK2    | CD56dim n $\epsilon$ Innate |

|          |                  |
|----------|------------------|
| RPL37A   | CD56dim n Innate |
| NOTCH3   | CD56dim n Innate |
| AKR7A3   | CD56dim n Innate |
| GPRC5C   | CD56dim n Innate |
| GRIN1    | CD56dim n Innate |
| HLA-E    | CD56dim n Innate |
| PORCN    | CD56dim n Innate |
| PSMC4    | CD56dim n Innate |
| UPP1     | CD56dim n Innate |
| IL21R    | CD56dim n Innate |
| KIR2DS1  | CD56dim n Innate |
| KIR2DS2  | CD56dim n Innate |
| KIR2DS5  | CD56dim n Innate |
| GIPR     | EosinophilInnate |
| KRT18P50 | EosinophilInnate |
| LRMP     | EosinophilInnate |
| FOSB     | EosinophilInnate |
| RRP12    | EosinophilInnate |
| GPR183   | EosinophilInnate |
| NR4A3    | EosinophilInnate |
| ST3GAL6  | EosinophilInnate |
| DEPDC5   | EosinophilInnate |
| PDE6C    | EosinophilInnate |
| PKD2L2   | EosinophilInnate |
| GPR65    | EosinophilInnate |
| IL5RA    | EosinophilInnate |
| P2RY14   | EosinophilInnate |
| DACH1    | EosinophilInnate |
| DAPK2    | EosinophilInnate |
| EMR3     | EosinophilInnate |
| ACADM    | Immature cInnate |
| AHCYL1   | Immature cInnate |
| ALDH1A2  | Immature cInnate |
| ALDH3A2  | Immature cInnate |
| ALDH9A1  | Immature cInnate |
| ALOX15   | Immature cInnate |
| AMT      | Immature cInnate |
| ARL1     | Immature cInnate |
| ATIC     | Immature cInnate |
| ATP5A1   | Immature cInnate |
| CAPZA1   | Immature cInnate |
| LILRA5   | Immature cInnate |
| RDX      | Immature cInnate |
| RRAGD    | Immature cInnate |
| TACSTD2  | Immature cInnate |
| INPP5F   | Immature cInnate |
| RAB38    | Immature cInnate |
| PLAU     | Immature cInnate |
| CSF3R    | Immature cInnate |
| SLC18A2  | Immature cInnate |
| AMPD2    | Immature cInnate |

|          |                   |
|----------|-------------------|
| CLTB     | Immature cInnate  |
| Clorf162 | Immature cInnate  |
| AIF1     | Macrophage Innate |
| CCL1     | Macrophage Innate |
| CCL14    | Macrophage Innate |
| CCL23    | Macrophage Innate |
| CCL26    | Macrophage Innate |
| CD300LB  | Macrophage Innate |
| CNR1     | Macrophage Innate |
| CNR2     | Macrophage Innate |
| EIF1     | Macrophage Innate |
| EIF4A1   | Macrophage Innate |
| FPR1     | Macrophage Innate |
| FPR2     | Macrophage Innate |
| FRAT2    | Macrophage Innate |
| GPR27    | Macrophage Innate |
| GPR77    | Macrophage Innate |
| RNASE2   | Macrophage Innate |
| MS4A2    | Macrophage Innate |
| BASP1    | Macrophage Innate |
| IGSF6    | Macrophage Innate |
| HK3      | Macrophage Innate |
| VNN1     | Macrophage Innate |
| FES      | Macrophage Innate |
| NPL      | Macrophage Innate |
| FZD2     | Macrophage Innate |
| FAM198B  | Macrophage Innate |
| HNMT     | Macrophage Innate |
| SLC15A3  | Macrophage Innate |
| CD4      | Macrophage Innate |
| TXNDC3   | Macrophage Innate |
| FRMD4A   | Macrophage Innate |
| CRYBB1   | Macrophage Innate |
| HRH1     | Macrophage Innate |
| WNT5B    | Macrophage Innate |
| ADAMTS3  | Mast cell Innate  |
| CPA3     | Mast cell Innate  |
| CMA1     | Mast cell Innate  |
| CTSG     | Mast cell Innate  |
| ARHGAP15 | Mast cell Innate  |
| CPM      | Mast cell Innate  |
| FCN1     | Mast cell Innate  |
| FTL      | Mast cell Innate  |
| HSPA6    | Mast cell Innate  |
| ITGA9    | Mast cell Innate  |
| RNASE3   | Mast cell Innate  |
| S100A4   | Mast cell Innate  |
| SIGLEC8  | Mast cell Innate  |
| SLC6A4   | Mast cell Innate  |
| PTGS2    | Mast cell Innate  |
| EGR3     | Mast cell Innate  |

|          |            |        |
|----------|------------|--------|
| PILRA    | Mast cell  | Innate |
| CCR2     | MDSC       | Innate |
| CD14     | MDSC       | Innate |
| CD2      | MDSC       | Innate |
| CD86     | MDSC       | Innate |
| CXCR4    | MDSC       | Innate |
| FCGR2A   | MDSC       | Innate |
| FCGR2B   | MDSC       | Innate |
| FCGR3A   | MDSC       | Innate |
| FERMT3   | MDSC       | Innate |
| GPSM3    | MDSC       | Innate |
| IL18BP   | MDSC       | Innate |
| IL4R     | MDSC       | Innate |
| ITGAL    | MDSC       | Innate |
| ITGAM    | MDSC       | Innate |
| PARVG    | MDSC       | Innate |
| PSAP     | MDSC       | Innate |
| PTGER2   | MDSC       | Innate |
| PTGES2   | MDSC       | Innate |
| S100A8   | MDSC       | Innate |
| S100A9   | MDSC       | Innate |
| ASGR2    | Monocyte   | Innate |
| CFP      | Monocyte   | Innate |
| ASGR1    | Monocyte   | Innate |
| CD1D     | Monocyte   | Innate |
| UPK3A    | Monocyte   | Innate |
| ACTG1    | Monocyte   | Innate |
| ANXA5    | Monocyte   | Innate |
| ATP6V1B2 | Monocyte   | Innate |
| CFL1     | Monocyte   | Innate |
| DAZAP2   | Monocyte   | Innate |
| CTBS     | Monocyte   | Innate |
| EMR4P    | Monocyte   | Innate |
| HIVEP2   | Monocyte   | Innate |
| MARCKSL1 | Monocyte   | Innate |
| MBP      | Monocyte   | Innate |
| MMP15    | Monocyte   | Innate |
| PNPLA6   | Monocyte   | Innate |
| TMBIM6   | Monocyte   | Innate |
| PQBP1    | Monocyte   | Innate |
| TEX264   | Monocyte   | Innate |
| IKZF1    | Monocyte   | Innate |
| AKT3     | Natural ki | Innate |
| AXL      | Natural ki | Innate |
| BST2     | Natural ki | Innate |
| CDH2     | Natural ki | Innate |
| CRTAM    | Natural ki | Innate |
| CSF2RA   | Natural ki | Innate |
| CTSZ     | Natural ki | Innate |
| CXCL1    | Natural ki | Innate |
| CYTH1    | Natural ki | Innate |

|          |         |          |
|----------|---------|----------|
| DAXX     | Natural | kiInnate |
| DGKH     | Natural | kiInnate |
| DLL4     | Natural | kiInnate |
| DPYD     | Natural | kiInnate |
| ERBB3    | Natural | kiInnate |
| F11R     | Natural | kiInnate |
| FAM27A   | Natural | kiInnate |
| FAM49A   | Natural | kiInnate |
| FASLG    | Natural | kiInnate |
| FCGR1A   | Natural | kiInnate |
| FN1      | Natural | kiInnate |
| FSTL1    | Natural | kiInnate |
| FUCA1    | Natural | kiInnate |
| GBP3     | Natural | kiInnate |
| GLS2     | Natural | kiInnate |
| GRB2     | Natural | kiInnate |
| LST1     | Natural | kiInnate |
| BCL2     | Natural | kiInnate |
| CDC5L    | Natural | kiInnate |
| FGF18    | Natural | kiInnate |
| FUT5     | Natural | kiInnate |
| FZR1     | Natural | kiInnate |
| GAGE2    | Natural | kiInnate |
| IGFBP5   | Natural | kiInnate |
| KANK2    | Natural | kiInnate |
| LDB3     | Natural | kiInnate |
| BTN2A2   | Natural | kiInnate |
| CD101    | Natural | kiInnate |
| CD109    | Natural | kiInnate |
| CNPY3    | Natural | kiInnate |
| CNPY4    | Natural | kiInnate |
| CREB1    | Natural | kiInnate |
| CRTC2    | Natural | kiInnate |
| CRTC3    | Natural | kiInnate |
| CSF2     | Natural | kiInnate |
| KLRC1    | Natural | kiInnate |
| FUT4     | Natural | kiInnate |
| ICAM2    | Natural | kiInnate |
| IL32     | Natural | kiInnate |
| LAMP2    | Natural | kiInnate |
| LILRB5   | Natural | kiInnate |
| KLRG1    | Natural | kiInnate |
| HSPA4    | Natural | kiInnate |
| HSPB6    | Natural | kiInnate |
| ISM2     | Natural | kiInnate |
| ITIH2    | Natural | kiInnate |
| KDM4C    | Natural | kiInnate |
| KIR2DS4  | Natural | kiInnate |
| KIRREL3  | Natural | kiInnate |
| SDCBP    | Natural | kiInnate |
| NFATC2IP | Natural | kiInnate |

|           |                  |
|-----------|------------------|
| MICB      | Natural kiInnate |
| KIR2DL1   | Natural kiInnate |
| KIR2DL3   | Natural kiInnate |
| KIR3DL1   | Natural kiInnate |
| KIR3DL2   | Natural kiInnate |
| NCR1      | Natural kiInnate |
| FOSL1     | Natural kiInnate |
| TSLP      | Natural kiInnate |
| SLC7A7    | Natural kiInnate |
| SPP1      | Natural kiInnate |
| TREM2     | Natural kiInnate |
| UBASH3A   | Natural kiInnate |
| YBX2      | Natural kiInnate |
| CCDC88A   | Natural kiInnate |
| CLEC1A    | Natural kiInnate |
| THBD      | Natural kiInnate |
| PDPN      | Natural kiInnate |
| VCAM1     | Natural kiInnate |
| EMR1      | Natural kiInnate |
| CREB5     | NeutrophilInnate |
| CDA       | NeutrophilInnate |
| CHST15    | NeutrophilInnate |
| S100A12   | NeutrophilInnate |
| APOBEC3A  | NeutrophilInnate |
| CASP5     | NeutrophilInnate |
| MMP25     | NeutrophilInnate |
| HAL       | NeutrophilInnate |
| C1orf183  | NeutrophilInnate |
| FFAR2     | NeutrophilInnate |
| MAK       | NeutrophilInnate |
| CXCR1     | NeutrophilInnate |
| STEAP4    | NeutrophilInnate |
| MGAM      | NeutrophilInnate |
| BTNL8     | NeutrophilInnate |
| CXCR2     | NeutrophilInnate |
| TNFRSF10C | NeutrophilInnate |
| VNN3      | NeutrophilInnate |
| CBX6      | PlasmacytcInnate |
| DAB2      | PlasmacytcInnate |
| DDX17     | PlasmacytcInnate |
| HIGD1A    | PlasmacytcInnate |
| IDH3A     | PlasmacytcInnate |
| IL3RA     | PlasmacytcInnate |
| MAGED1    | PlasmacytcInnate |
| NUCB2     | PlasmacytcInnate |
| OFD1      | PlasmacytcInnate |
| OGT       | PlasmacytcInnate |
| PDIA4     | PlasmacytcInnate |
| SERTAD2   | PlasmacytcInnate |
| SIRPA     | PlasmacytcInnate |
| TMED2     | PlasmacytcInnate |

|         |                  |
|---------|------------------|
| ENG     | PlasmacytcInnate |
| FCAR    | PlasmacytcInnate |
| IGF1    | PlasmacytcInnate |
| ITGA2B  | PlasmacytcInnate |
| GABARAP | PlasmacytcInnate |
| GPX1    | PlasmacytcInnate |
| KRT23   | PlasmacytcInnate |
| PROK2   | PlasmacytcInnate |
| RALB    | PlasmacytcInnate |
| RETNLB  | PlasmacytcInnate |
| RNF141  | PlasmacytcInnate |
| SEC14L1 | PlasmacytcInnate |
| SEPX1   | PlasmacytcInnate |
| EMP3    | PlasmacytcInnate |
| CD300LF | PlasmacytcInnate |
| ABTB1   | PlasmacytcInnate |
| KLHL21  | PlasmacytcInnate |
| PHRF1   | PlasmacytcInnate |
